# Supplementary material for: The Role of miR-21 in Osteoblasts–Osteoclasts Coupling In Vitro
Source: MDPI journal article supplement (doi:10.3390/cells9020479), 2020-02-19
Supplement: s1 [file s1]

**Table 1 S.** Sequences of the primers used in the experiment.

| Gene name                                           | Gene abbreviation | Primer   | Sequence 5'-3'                                     | Amplicon length [bp] | Annealing temperature [°C] | Accession no.  |
|-----------------------------------------------------|-------------------|----------|----------------------------------------------------|----------------------|----------------------------|----------------|
| Osteopontin                                         | <i>Opn</i>        | F:<br>R: | AGACCATGCAGAGAGCGAG<br>GCCCTTTCGGTTGTTGCCT         | 340                  | 57,3                       | NM_001204203.1 |
| Osteocalcin                                         | <i>Ocl</i>        | F:<br>R: | GGTGCAGACCTAGCAGACACCA<br>CGCTGGGCTTGGCATCTGTAA    | 100                  | 57                         | NM_001032298.3 |
| Collagen type I                                     | <i>Coll-1</i>     | F:<br>R: | CAGGGATTGCTGGACAACGTG<br>GGACCTTGTTGCCAGGTTCA      | 107                  | 61,4                       | NM_007742.4    |
| Tartrate-resistant acid phosphatase                 | <i>Trap</i>       | F:<br>R: | GTCTCTGGGGGACAATTTCTACT<br>GTTTGTACGTGGAATTTTGAAGC | 241                  | 60                         | XM_006509945.3 |
| Runt related transcription factor 2                 | <i>Runx-2</i>     | F:<br>R: | TCCGAAATGCCTCTGCTGTT<br>GCCACTTGGGGAGGATTTGT       | 130                  | 58,8                       | NM_001271630.1 |
| Receptor activator of nuclear factor kappa B        | <i>Rank</i>       | F:<br>R: | TTAAGCCAGTGTTCACCGG<br>ACATACACCACGATGATGTC        | 473                  | 58,8                       | NM_009399.3    |
| Receptor activator of nuclear factor kappa B ligand | <i>Rankl</i>      | F:<br>R: | ACGCAGATTTGCAGGACTCGAC<br>TTCGTGCTCCCTCCTTCATC     | 493                  | 58,8                       | NM_011613.3    |
| Osteoprotegerin                                     | <i>Opg</i>        | F:<br>R: | AGCCACGCAAAAGTGTGGAA<br>TCCTCTCTACACTCTCGGCA       | 149                  | 58,8                       | NM_008764.3    |
| Cathepsin K                                         | <i>Ctsk</i>       | F:<br>R: | TAACAGCAAGGTGGATGAAATCT<br>CTGTAGGATCGAGAGGGAGGTAT | 195                  | 60                         | NM_007802.4    |
| Carbonic anhydrase II                               | <i>Ca II</i>      | F:<br>R: | TCAGGGAGCCCATTACTGTC<br>TCCAAATCACCCAGCCTAAC       | 234                  | 60                         | NM_001357334.1 |
| Matrix metalloproteinase 9                          | <i>Mmp-9</i>      | F:<br>R: | TTGCCCTACTGGAAGGTATTAT<br>GAGAATCTCTGAGCAATCCTTGA  | 172                  | 60                         | NM_013599.4    |
| Glyceraldehyde-3-phosphate dehydrogenase            | <i>Gapdh</i>      | F:<br>R: | TGCACCACCAACTGCTTAG<br>GGATGCAGGGATGATGTTT         | 177                  | 60                         | XM_017321385.2 |
| B cell leukemia/lymphoma 2                          | <i>Bcl-2</i>      | F:<br>R: | GGATCCAGGATAACGGAGGC<br>ATGCACCCAGAGTGATGCAG       | 141                  | 58,8                       | NM_009741.5    |
| BCL2-associated X protein                           | <i>Bax</i>        | F:<br>R: | AGGATCGCTCCACCAAGAAGC<br>GGTCTGATCAGCTCGGCA        | 251                  | 58,8                       | XM_011250780.3 |

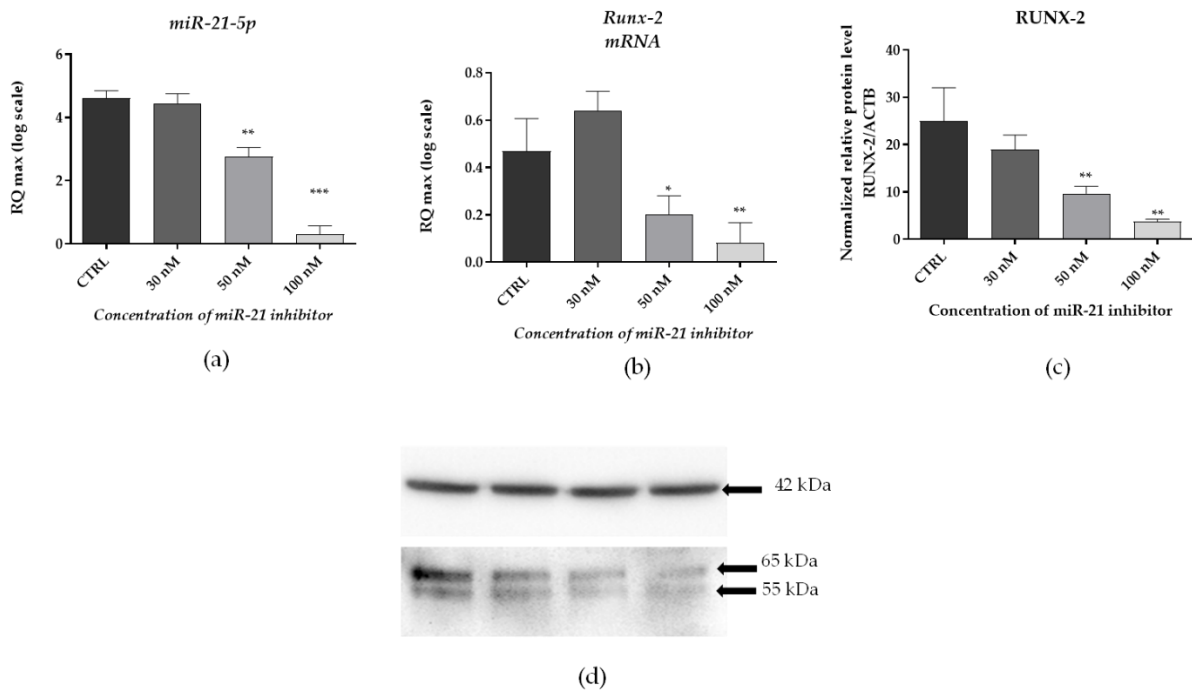

**Figure 1S.** Analysis of effectiveness of miR-21 inhibition in MC3T3 cell line. The analysis included determination of miR-21 levels using Two-tailed RT-qPCR (a) and determination of target gene expression, *Runx-2* using RT-qPCR (b). The RUNX-2 protein was determined using Western blot technique. The highest effectiveness of miR-21 inhibition was noted in cultures where 100 nM concentration was applied (~80% of effectiveness). However, based on cell viability for further assays 50 nM concentration was used. The effectiveness of 50 nM miR-21 inhibition determined based on miR-21 levels and Runx-2 expression (mRNA and protein level) was around 50%.

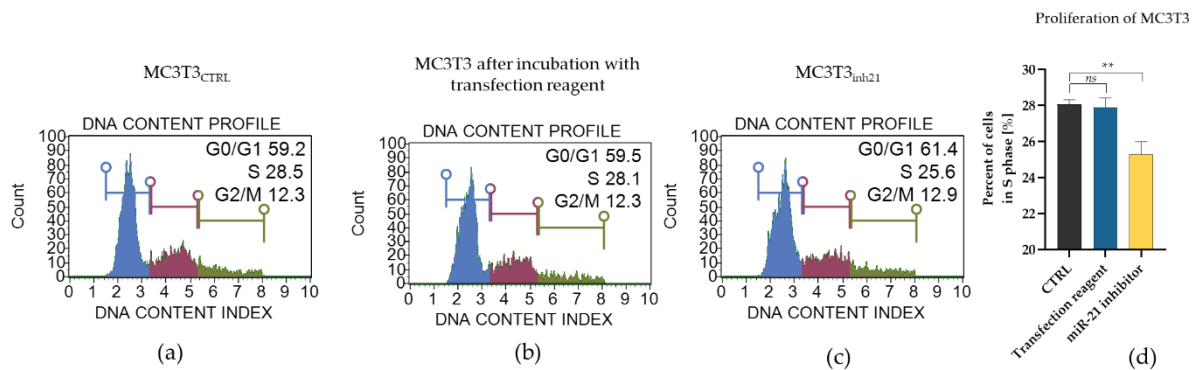

**Figure 2S.** The influence of transfection with miR21 inhibitor on MC3T3 proliferative activity. Representative histograms indicating the distribution of pre-osteoblasts in the cell cycle (a-c). The percentage of cells in S phase was compared and statistical analysis was performed using One-way analysis of variance and Dunnett's post hoc test (d). The data were analysed using GraphPad Software (Prism 8.20, CA, USA). Differences with a probability of  $p < 0.05$  were considered as significant. The significant differences are indicated with asterisks (\*\*  $p < 0.01$  and \*\*\*  $p < 0.001$ ), while non-significant differences are marked as *ns*.

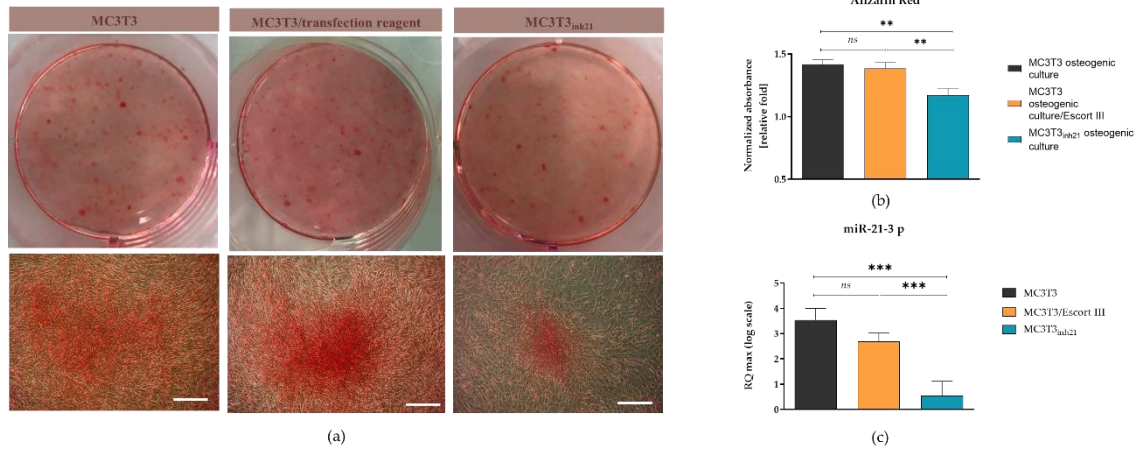

**Figure 3S.** The results showing a specific action of miR-21 inhibitor in osteogenic cultures. Analysis included Alizarin Red staining of extracellular matrix (a) and measurement of staining insensitivity (b). Moreover, miR-21 levels were determined using Two-tailed RT-qPCR (c). The osteogenic potential of MC3T3 transfected with miR-21 was decreased, what was correlated with lowered mineralization of extracellular matrix (a-b). Osteogenic capability of MC3T3 and miR-21 levels were not influenced by transfection procedure (a-c). Statistical analysis was performed to determine significance of obtained results. The significant differences are indicated with asterisks (\*\*  $p < 0.01$  and \*\*\*  $p < 0.001$ ), while non-significant differences are marked as *ns*.

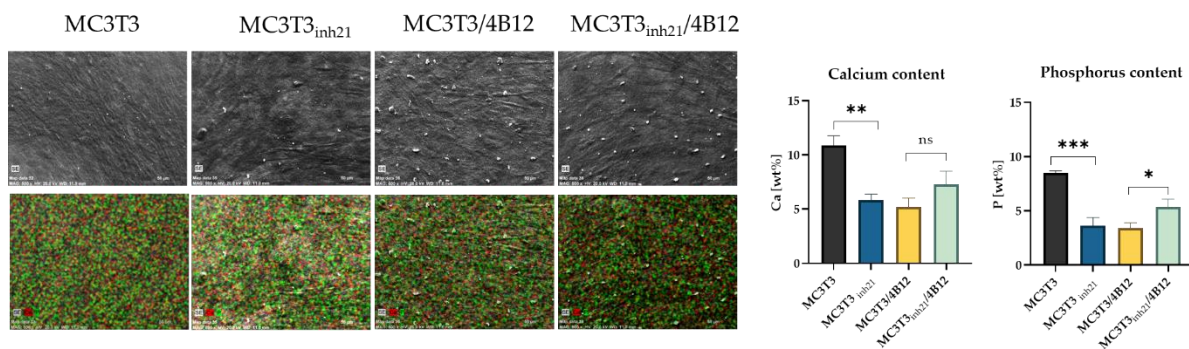

**Figure 4S.** The analysis of calcium (Ca) and phosphorus (P) content deposited in extracellular matrix formed by MC3T3. Measurements were performed using SEM-EDX. Images of cultures were taken under 500-fold magnification. SEM-EDX maps indicate on Ca and P distribution. The elements were measured and their content was presented as weight percentage (wt%). Statistical analysis was performed to determine significance of obtained results. The significant differences are indicated with asterisks (\*\*  $p < 0.01$  and \*\*\*  $p < 0.001$ ), while non-significant differences are marked as *ns*.

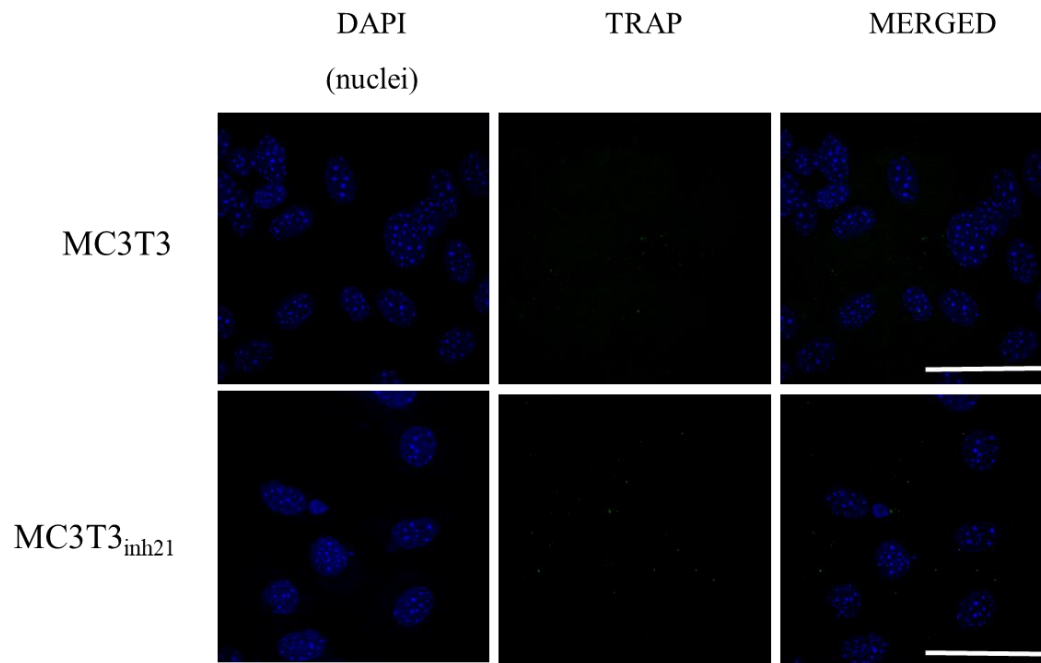

**Figure 5S.** The influence of miR-21 inhibition on TRAP expression in the MC3T3 osteoblasts. Representative images showing co-localization of TRAP (green signal) with nuclei (blue, DAPI stained) in pre-osteoblast cultures, both control (MC3T3) and with decreased expression of miR-21 (MC3T3<sub>inh21</sub>). The images were taken under 60-fold magnification. The scale bar is equal 50  $\mu$ m.
